# Supplementary material for: The PTM profiling of CTCF reveals the regulation of 3D chromatin structure by O-GlcNAcylation
Source: PubMed Central journal article supplement (PMC10985093; doi:10.1038/s41467-024-47048-3), 2024-04-01
Supplement: 41467_2024_47048_MOESM2_ESM.pdf [file 41467_2024_47048_MOESM2_ESM.pdf]

The PTM profiling of CTCF reveals the regulation of 3D chromatin structure by O-GlcNAcylation

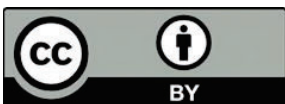

**Open Access** This file is licensed under a Creative Commons Attribution 4.0 International License, which permits use, sharing, adaptation, distribution and reproduction in any medium or format, as long as you give appropriate credit to the original author(s) and the source, provide a link to the Creative Commons license, and indicate if changes were made. In the cases where the authors are anonymous, such as is the case for the reports of anonymous peer reviewers, author attribution should be to 'Anonymous Referee' followed by a clear attribution to the source work. The images or other third party material in this file are included in the article's Creative Commons license, unless indicated otherwise in a credit line to the material. If material is not included in the article's Creative Commons license and your intended use is not permitted by statutory regulation or exceeds the permitted use, you will need to obtain permission directly from the copyright holder. To view a copy of this license, visit <http://creativecommons.org/licenses/by/4.0/>.

**Editorial Note:** This manuscript has been previously reviewed at another journal. This document only contains reviewer comments and rebuttal letters for versions considered at *Nature Communications*.

#### REVIEWERS' COMMENTS

Reviewer #1 (Remarks to the Author):

The authors have addressed all my previous concerns, which were all due to the low quality of the Hi-C data. The authors have performed additional Hi-C experiments and sequenced the libraries to a depth of approximately 4 billion contacts. This has resulted in a dramatic increase in the quality of all heatmaps shown in the manuscript. The authors have replaced all figures with new ones obtained with the improved Hi-C datasets. With the additional data analyses and results, the manuscript now describes an interesting finding to explain how CTCF function can be regulated by covalent modifications. The manuscript is appropriate for publication in its current form

Reviewer #2 (Remarks to the Author):

The revised manuscript addresses my comments from the previous submission and I have no further comments.

Reviewer #1 (Remarks to the Author):

The authors have addressed all my previous concerns, which were all due to the low quality of the Hi-C data. The authors have performed additional Hi-C experiments and sequenced the libraries to a depth of approximately 4 billion contacts. This has resulted in a dramatic increase in the quality of all heatmaps shown in the manuscript. The authors have replaced all figures with new ones obtained with the improved Hi-C datasets. With the additional data analyses and results, the manuscript now describes an interesting finding to explain how CTCF function can be regulated by covalent modifications. The manuscript is appropriate for publication in its current form.

[Response: Thank you for the review and recognition of our work.](#)

Reviewer #2 (Remarks to the Author):

The revised manuscript addresses my comments from the previous submission and I have no further comments.

[Response: We appreciate your evaluation.](#)
